# Supplementary material for: Influence of osteoporosis on the compressive properties of femoral cancellous bone and its dependence on various density parameters
Source: PubMed Central journal article supplement (PMC8225914; doi:10.1038/s41598-021-92685-z), 2021-06-24
Supplement: 41598_2021_92685_MOESM1_ESM.pdf [file 41598_2021_92685_MOESM1_ESM.pdf]

# **Influence of osteoporosis on the compressive properties of femoral cancellous bone and its dependence on various density parameters**

## **Supplementary Material**

Metzner, F.<sup>1,2,3</sup> \*.; Neupetsch, C.<sup>1,2</sup>; Fischer, J.-P.<sup>3,4</sup> Drossel, W.-G.<sup>1,2</sup>; Heyde C.-E.<sup>3,4</sup>;  
Schleifenbaum, S.<sup>2,3,4</sup>

First and second author contributed equally to this publication

1.) Professorship for Adaptronics and Lightweight Design in Production, Institute for Machine Tools and Production Processes, Chemnitz University of Technology, Chemnitz, Germany

2.) Fraunhofer Institute for Machine Tools and Forming Technology, Dresden, Germany

3.) ZESBO - Center for Research on Musculoskeletal Systems, Department of Orthopaedic Surgery, Traumatology and Plastic Surgery, Leipzig University, Leipzig, Germany

4.) Department of Orthopedic Surgery, Traumatology and Plastic Surgery, Leipzig University, Leipzig, Germany

### **Corresponding Author**

M.Sc. Florian Metzner  
Research associate  
Phone: +49 341 97 23241  
E-Mail: florian.metzner@mb.tu-chemnitz.de  
Address: Semmelweisstraße 14, 04103 Leipzig, Germany

# 1. T-Test Male vs. Female

| <b>Group Statistics</b> |        |    |           |                |                 |
|-------------------------|--------|----|-----------|----------------|-----------------|
|                         | Gender | N  | Mean      | Std. Deviation | Std. Error Mean |
| Age                     | Male   | 20 | 80,75     | 8,693          | 1,944           |
|                         | Female | 21 | 80,67     | 12,963         | 2,829           |
| T_Score                 | Male   | 20 | -,99900   | 1,307476       | ,292361         |
|                         | Female | 19 | -2,40526  | ,916196        | ,210190         |
| BMD                     | Male   | 20 | ,79295    | ,179431        | ,040122         |
|                         | Female | 19 | ,59958    | ,109484        | ,025117         |
| ρ_b_1                   | Male   | 19 | 1,2901    | ,09278         | ,02129          |
|                         | Female | 18 | 1,2421    | ,10620         | ,02503          |
| ρ_b_2                   | Male   | 19 | 1,2899    | ,18035         | ,04137          |
|                         | Female | 18 | 1,2844    | ,11420         | ,02692          |
| ρ_r_1                   | Male   | 19 | 70,4572   | 10,89609       | 2,49973         |
|                         | Female | 18 | 64,0048   | 10,56578       | 2,49038         |
| ρ_r_2                   | Male   | 19 | 48,4813   | 16,93503       | 3,88516         |
|                         | Female | 18 | 35,2951   | 9,74101        | 2,29598         |
| ρ_app_1                 | Male   | 19 | ,9062     | ,13981         | ,03207          |
|                         | Female | 18 | ,7928     | ,13884         | ,03273          |
| ρ_app_2                 | Male   | 19 | ,6132     | ,20508         | ,04705          |
|                         | Female | 18 | ,4474     | ,10863         | ,02560          |
| σ_p                     | Male   | 18 | 8,83256   | 3,905320       | ,920493         |
|                         | Female | 15 | 8,25413   | 4,090962       | 1,056282        |
| σ_max                   | Male   | 20 | 9,67900   | 7,118355       | 1,591713        |
|                         | Female | 19 | 6,92626   | 3,811073       | ,874320         |
| E                       | Male   | 20 | 604,63125 | 261,166803     | 58,398673       |
|                         | Female | 19 | 619,87589 | 293,786402     | 67,399223       |

### Independent Samples Test

|         |                                      | Levene's Test<br>for Equality of<br>Variances |      | t-test for Equality of Means |        |                        |                    |                          |                                              |          |
|---------|--------------------------------------|-----------------------------------------------|------|------------------------------|--------|------------------------|--------------------|--------------------------|----------------------------------------------|----------|
|         |                                      | F                                             | Sig. | t                            | df     | Sig.<br>(2-<br>tailed) | Mean<br>Difference | Std. Error<br>Difference | 95% Confidence Interval<br>of the Difference |          |
|         |                                      |                                               |      |                              |        |                        |                    |                          | Lower                                        | Upper    |
| Age     | Equal<br>variances<br>assumed        | 6,232                                         | ,017 | ,024                         | 39     | ,981                   | ,083               | 3,465                    | -6,925                                       | 7,092    |
|         | Equal<br>variances<br>not<br>assumed |                                               |      | ,024                         | 35,107 | ,981                   | ,083               | 3,432                    | -6,884                                       | 7,050    |
| T_Score | Equal<br>variances<br>assumed        | 5,167                                         | ,029 | 3,871                        | 37     | ,000                   | 1,406263           | ,363326                  | ,670094                                      | 2,142432 |
|         | Equal<br>variances<br>not<br>assumed |                                               |      | 3,905                        | 34,101 | ,000                   | 1,406263           | ,360076                  | ,674581                                      | 2,137945 |
| BMD     | Equal<br>variances<br>assumed        | 8,655                                         | ,006 | 4,036                        | 37     | ,000                   | ,193371            | ,047909                  | ,096298                                      | ,290444  |
|         | Equal<br>variances<br>not<br>assumed |                                               |      | 4,085                        | 31,675 | ,000                   | ,193371            | ,047336                  | ,096913                                      | ,289829  |
| ρ_b_1   | Equal<br>variances<br>assumed        | 1,019                                         | ,320 | 1,464                        | 35     | ,152                   | ,04794             | ,03274                   | -,01852                                      | ,11440   |
|         | Equal<br>variances<br>not<br>assumed |                                               |      | 1,459                        | 33,789 | ,154                   | ,04794             | ,03286                   | -,01885                                      | ,11473   |
| ρ_b_2   | Equal<br>variances<br>assumed        | 2,107                                         | ,156 | ,109                         | 35     | ,914                   | ,00545             | ,04995                   | -,09595                                      | ,10685   |

|                    |                             |        |      |       |        |      |          |          |           |          |
|--------------------|-----------------------------|--------|------|-------|--------|------|----------|----------|-----------|----------|
|                    | Equal variances not assumed |        |      | ,110  | 30,648 | ,913 | ,00545   | ,04936   | -,09527   | ,10617   |
| ρ <sub>r_1</sub>   | Equal variances assumed     | ,066   | ,799 | 1,827 | 35     | ,076 | 6,45243  | 3,53157  | -,71703   | 13,62190 |
|                    | Equal variances not assumed |        |      | 1,829 | 34,978 | ,076 | 6,45243  | 3,52855  | -,71106   | 13,61592 |
| ρ <sub>r_2</sub>   | Equal variances assumed     | 9,885  | ,003 | 2,881 | 35     | ,007 | 13,18615 | 4,57637  | 3,89563   | 22,47668 |
|                    | Equal variances not assumed |        |      | 2,922 | 29,020 | ,007 | 13,18615 | 4,51287  | 3,95657   | 22,41573 |
| ρ <sub>app_1</sub> | Equal variances assumed     | ,019   | ,891 | 2,473 | 35     | ,018 | ,11332   | ,04583   | ,02028    | ,20637   |
|                    | Equal variances not assumed |        |      | 2,473 | 34,917 | ,018 | ,11332   | ,04582   | ,02029    | ,20636   |
| ρ <sub>app_2</sub> | Equal variances assumed     | 5,068  | ,031 | 3,048 | 35     | ,004 | ,16582   | ,05441   | ,05537    | ,27627   |
|                    | Equal variances not assumed |        |      | 3,096 | 27,671 | ,004 | ,16582   | ,05356   | ,05604    | ,27560   |
| σ <sub>p</sub>     | Equal variances assumed     | ,051   | ,823 | ,415  | 31     | ,681 | ,578422  | 1,394995 | -2,266690 | 3,423534 |
|                    | Equal variances not assumed |        |      | ,413  | 29,383 | ,683 | ,578422  | 1,401085 | -2,285497 | 3,442342 |
| σ <sub>max</sub>   | Equal variances assumed     | 13,255 | ,001 | 1,494 | 37     | ,144 | 2,752737 | 1,842737 | -,981002  | 6,486476 |

|   |                                      |      |      |       |        |      |                |           |                 |            |
|---|--------------------------------------|------|------|-------|--------|------|----------------|-----------|-----------------|------------|
|   | Equal<br>variances<br>not<br>assumed |      |      | 1,516 | 29,373 | ,140 | 2,752737       | 1,816035  | -,959427        | 6,464900   |
| E | Equal<br>variances<br>assumed        | ,032 | ,860 | -,171 | 37     | ,865 | -<br>15,244645 | 88,905202 | -<br>195,383695 | 164,894406 |
|   | Equal<br>variances<br>not<br>assumed |      |      | -,171 | 35,967 | ,865 | -<br>15,244645 | 89,179932 | -<br>196,115657 | 165,626368 |

## 2. T-Test Left vs. Right

| Group Statistics |       |    |           |                |                 |
|------------------|-------|----|-----------|----------------|-----------------|
|                  | Side  | N  | Mean      | Std. Deviation | Std. Error Mean |
| Age              | Left  | 21 | 82,10     | 11,580         | 2,527           |
|                  | Right | 20 | 79,25     | 10,341         | 2,312           |
| T_Score          | Left  | 20 | -1,97000  | 1,379969       | ,308571         |
|                  | Right | 19 | -1,38316  | 1,232004       | ,282641         |
| BMD              | Left  | 20 | ,65410    | ,184254        | ,041200         |
|                  | Right | 19 | ,74574    | ,160720        | ,036872         |
| $\rho_{b_1}$     | Left  | 19 | 1,2716    | ,09685         | ,02222          |
|                  | Right | 18 | 1,2616    | ,10797         | ,02545          |
| $\rho_{b_2}$     | Left  | 19 | 1,2773    | ,13216         | ,03032          |
|                  | Right | 18 | 1,2977    | ,16963         | ,03998          |
| $\rho_{r_1}$     | Left  | 19 | 66,8303   | 12,85607       | 2,94939         |
|                  | Right | 18 | 67,8332   | 9,18878        | 2,16582         |
| $\rho_{r_2}$     | Left  | 19 | 39,2799   | 16,18350       | 3,71275         |
|                  | Right | 18 | 45,0076   | 14,06921       | 3,31614         |
| $\rho_{app_1}$   | Left  | 19 | ,8473     | ,16146         | ,03704          |
|                  | Right | 18 | ,8550     | ,13900         | ,03276          |
| $\rho_{app_2}$   | Left  | 19 | ,4921     | ,18402         | ,04222          |
|                  | Right | 18 | ,5753     | ,17793         | ,04194          |
| $\sigma_p$       | Left  | 17 | 8,03441   | 3,890195       | ,943511         |
|                  | Right | 16 | 9,13831   | 4,034310       | 1,008577        |
| $\sigma_{max}$   | Left  | 20 | 6,90870   | 4,581238       | 1,024396        |
|                  | Right | 19 | 9,84237   | 6,730502       | 1,544083        |
| E                | Left  | 20 | 586,81280 | 294,922155     | 65,946599       |
|                  | Right | 19 | 638,63216 | 255,281977     | 58,565702       |

### Independent Samples Test

|         |                             | Levene's Test for Equality of Variances |      | t-test for Equality of Means |        |                 |                 |                       |                                           |         |
|---------|-----------------------------|-----------------------------------------|------|------------------------------|--------|-----------------|-----------------|-----------------------|-------------------------------------------|---------|
|         |                             | F                                       | Sig. | t                            | df     | Sig. (2-tailed) | Mean Difference | Std. Error Difference | 95% Confidence Interval of the Difference |         |
|         |                             |                                         |      |                              |        |                 |                 |                       | Lower                                     | Upper   |
| Age     | Equal variances assumed     | ,320                                    | ,575 | ,828                         | 39     | ,413            | 2,845           | 3,435                 | -4,102                                    | 9,793   |
|         | Equal variances not assumed |                                         |      | ,831                         | 38,846 | ,411            | 2,845           | 3,425                 | -4,084                                    | 9,774   |
| T_Score | Equal variances assumed     | ,000                                    | ,992 | -1,398                       | 37     | ,170            | -,586842        | ,419698               | -1,437231                                 | ,263547 |
|         | Equal variances not assumed |                                         |      | -1,402                       | 36,865 | ,169            | -,586842        | ,418452               | -1,434811                                 | ,261126 |
| BMD     | Equal variances assumed     | ,002                                    | ,969 | -1,651                       | 37     | ,107            | -,091637        | ,055488               | -,204067                                  | ,020793 |
|         | Equal variances not assumed |                                         |      | -1,657                       | 36,744 | ,106            | -,091637        | ,055290               | -,203692                                  | ,020418 |
| ρ_b_1   | Equal variances assumed     | ,110                                    | ,742 | ,296                         | 35     | ,769            | ,00997          | ,03368                | -,05841                                   | ,07835  |
|         | Equal variances not assumed |                                         |      | ,295                         | 34,088 | ,770            | ,00997          | ,03378                | -,05868                                   | ,07862  |
| ρ_b_2   | Equal variances assumed     | ,007                                    | ,935 | -,409                        | 35     | ,685            | -,02041         | ,04984                | -,12158                                   | ,08077  |

|                |                             |       |      |        |        |      |           |          |           |          |
|----------------|-----------------------------|-------|------|--------|--------|------|-----------|----------|-----------|----------|
|                | Equal variances not assumed |       |      | -,407  | 32,137 | ,687 | -,02041   | ,05018   | -,12260   | ,08179   |
| $\rho_{r_1}$   | Equal variances assumed     | 2,028 | ,163 | -,272  | 35     | ,788 | -1,00285  | 3,69226  | -8,49853  | 6,49283  |
|                | Equal variances not assumed |       |      | -,274  | 32,607 | ,786 | -1,00285  | 3,65918  | -8,45093  | 6,44522  |
| $\rho_{r_2}$   | Equal variances assumed     | ,522  | ,475 | -1,146 | 35     | ,260 | -5,72766  | 4,99737  | -15,87286 | 4,41753  |
|                | Equal variances not assumed |       |      | -1,151 | 34,755 | ,258 | -5,72766  | 4,97808  | -15,83626 | 4,38093  |
| $\rho_{app_1}$ | Equal variances assumed     | ,643  | ,428 | -1,156 | 35     | ,877 | -,00774   | ,04966   | -,10854   | ,09307   |
|                | Equal variances not assumed |       |      | -1,156 | 34,696 | ,877 | -,00774   | ,04945   | -,10816   | ,09269   |
| $\rho_{app_2}$ | Equal variances assumed     | ,101  | ,753 | -1,397 | 35     | ,171 | -,08323   | ,05956   | -,20415   | ,03770   |
|                | Equal variances not assumed |       |      | -1,399 | 34,983 | ,171 | -,08323   | ,05951   | -,20404   | ,03758   |
| $\sigma_p$     | Equal variances assumed     | ,059  | ,810 | -,800  | 31     | ,430 | -1,103901 | 1,379531 | -3,917474 | 1,709672 |
|                | Equal variances not assumed |       |      | -,799  | 30,700 | ,430 | -1,103901 | 1,381101 | -3,921793 | 1,713991 |
| $\sigma_{max}$ | Equal variances assumed     | 4,429 | ,042 | -1,599 | 37     | ,118 | -2,933668 | 1,835176 | -6,652089 | ,784752  |



|   |                                      |      |      |            |        |      |                |           |                 |            |
|---|--------------------------------------|------|------|------------|--------|------|----------------|-----------|-----------------|------------|
|   | Equal<br>variances<br>not<br>assumed |      |      | -<br>1,583 | 31,543 | ,123 | -2,933668      | 1,852992  | -6,710235       | ,842898    |
| E | Equal<br>variances<br>assumed        | ,029 | ,865 | -,585      | 37     | ,562 | -<br>51,819358 | 88,531586 | -<br>231,201391 | 127,562675 |
|   | Equal<br>variances<br>not<br>assumed |      |      | -,588      | 36,695 | ,560 | -<br>51,819358 | 88,198046 | -<br>230,575703 | 126,936987 |

### 3. T-Test Normal vs. Osteoporosis

| <b>Group Statistics</b> |                  |    |           |                |                 |
|-------------------------|------------------|----|-----------|----------------|-----------------|
|                         | Osteoporosis_WHO | N  | Mean      | Std. Deviation | Std. Error Mean |
| Age                     | Normal           | 9  | 75,89     | 10,659         | 3,553           |
|                         | Osteoporosis     | 10 | 88,50     | 7,397          | 2,339           |
| T_Score                 | Normal           | 9  | ,26889    | ,733969        | ,244656         |
|                         | Osteoporosis     | 10 | -3,15000  | ,638140        | ,201797         |
| BMD                     | Normal           | 9  | ,96567    | ,104468        | ,034823         |
|                         | Osteoporosis     | 10 | ,52600    | ,101056        | ,031957         |
| $\rho_{b_1}$            | Normal           | 8  | 1,3496    | ,09379         | ,03316          |
|                         | Osteoporosis     | 9  | 1,2359    | ,10045         | ,03348          |
| $\rho_{b_2}$            | Normal           | 8  | 1,3630    | ,20743         | ,07334          |
|                         | Osteoporosis     | 9  | 1,2797    | ,12287         | ,04096          |
| $\rho_{r_1}$            | Normal           | 8  | 72,9768   | 13,99197       | 4,94691         |
|                         | Osteoporosis     | 9  | 60,0649   | 6,45287        | 2,15096         |
| $\rho_{r_2}$            | Normal           | 8  | 59,8340   | 13,95933       | 4,93537         |
|                         | Osteoporosis     | 9  | 34,9587   | 12,59395       | 4,19798         |
| $\rho_{app_1}$          | Normal           | 8  | ,9808     | ,17442         | ,06167          |
|                         | Osteoporosis     | 9  | ,7441     | ,10723         | ,03574          |
| $\rho_{app_2}$          | Normal           | 8  | ,7948     | ,14177         | ,05012          |
|                         | Osteoporosis     | 9  | ,4382     | ,13148         | ,04383          |
| $\sigma_p$              | Normal           | 8  | 11,30050  | 3,473780       | 1,228167        |
|                         | Osteoporosis     | 8  | 7,53500   | 3,892683       | 1,376271        |
| $\sigma_{max}$          | Normal           | 9  | 14,11411  | 7,310808       | 2,436936        |
|                         | Osteoporosis     | 10 | 6,15700   | 3,053231       | ,965516         |
| E                       | Normal           | 9  | 647,24400 | 299,580037     | 99,860012       |
|                         | Osteoporosis     | 10 | 604,46910 | 200,184081     | 63,303765       |

### Independent Samples Test

|         |                             | Levene's Test for Equality of Variances |      | t-test for Equality of Means |        |                 |                 |                       |                                           |          |
|---------|-----------------------------|-----------------------------------------|------|------------------------------|--------|-----------------|-----------------|-----------------------|-------------------------------------------|----------|
|         |                             | F                                       | Sig. | t                            | df     | Sig. (2-tailed) | Mean Difference | Std. Error Difference | 95% Confidence Interval of the Difference |          |
|         |                             |                                         |      |                              |        |                 |                 |                       | Lower                                     | Upper    |
| Age     | Equal variances assumed     | ,804                                    | ,383 | -3,023                       | 17     | ,008            | -12,611         | 4,172                 | -21,413                                   | -3,810   |
|         | Equal variances not assumed |                                         |      | -2,965                       | 14,086 | ,010            | -12,611         | 4,254                 | -21,730                                   | -3,493   |
| T_Score | Equal variances assumed     | 1,264                                   | ,277 | 10,864                       | 17     | ,000            | 3,418889        | ,314694               | 2,754943                                  | 4,082834 |
|         | Equal variances not assumed |                                         |      | 10,780                       | 16,004 | ,000            | 3,418889        | ,317142               | 2,746591                                  | 4,091187 |
| BMD     | Equal variances assumed     | ,753                                    | ,397 | 9,320                        | 17     | ,000            | ,439667         | ,047176               | ,340134                                   | ,539200  |
|         | Equal variances not assumed |                                         |      | 9,302                        | 16,651 | ,000            | ,439667         | ,047263               | ,339790                                   | ,539543  |
| ρ_b_1   | Equal variances assumed     | ,013                                    | ,910 | 2,403                        | 15     | ,030            | ,11374          | ,04733                | ,01286                                    | ,21461   |
|         | Equal variances not assumed |                                         |      | 2,413                        | 14,951 | ,029            | ,11374          | ,04713                | ,01326                                    | ,21421   |
| ρ_b_2   | Equal variances assumed     | ,544                                    | ,472 | 1,022                        | 15     | ,323            | ,08333          | ,08150                | -,09038                                   | ,25705   |

|                    |                             |       |      |       |        |      |          |          |          |           |
|--------------------|-----------------------------|-------|------|-------|--------|------|----------|----------|----------|-----------|
|                    | Equal variances not assumed |       |      | ,992  | 11,103 | ,342 | ,08333   | ,08400   | -,10134  | ,26801    |
| ρ <sub>r_1</sub>   | Equal variances assumed     | 3,380 | ,086 | 2,493 | 15     | ,025 | 12,91186 | 5,17832  | 1,87453  | 23,94920  |
|                    | Equal variances not assumed |       |      | 2,394 | 9,597  | ,039 | 12,91186 | 5,39430  | ,82381   | 24,99991  |
| ρ <sub>r_2</sub>   | Equal variances assumed     | ,220  | ,646 | 3,864 | 15     | ,002 | 24,87533 | 6,43769  | 11,15373 | 38,59694  |
|                    | Equal variances not assumed |       |      | 3,839 | 14,261 | ,002 | 24,87533 | 6,47927  | 11,00253 | 38,74814  |
| ρ <sub>app_1</sub> | Equal variances assumed     | 2,470 | ,137 | 3,416 | 15     | ,004 | ,23664   | ,06928   | ,08897   | ,38431    |
|                    | Equal variances not assumed |       |      | 3,320 | 11,370 | ,007 | ,23664   | ,07128   | ,08038   | ,39290    |
| ρ <sub>app_2</sub> | Equal variances assumed     | ,121  | ,732 | 5,380 | 15     | ,000 | ,35653   | ,06627   | ,21528   | ,49777    |
|                    | Equal variances not assumed |       |      | 5,355 | 14,420 | ,000 | ,35653   | ,06658   | ,21412   | ,49894    |
| σ <sub>p</sub>     | Equal variances assumed     | ,024  | ,880 | 2,041 | 14     | ,061 | 3,765500 | 1,844591 | -,190754 | 7,721754  |
|                    | Equal variances not assumed |       |      | 2,041 | 13,822 | ,061 | 3,765500 | 1,844591 | -,195530 | 7,726530  |
| σ <sub>max</sub>   | Equal variances assumed     | 7,916 | ,012 | 3,157 | 17     | ,006 | 7,957111 | 2,520268 | 2,639810 | 13,274413 |

|   |                                      |       |      |       |        |      |           |            |                 |            |
|---|--------------------------------------|-------|------|-------|--------|------|-----------|------------|-----------------|------------|
|   | Equal<br>variances<br>not<br>assumed |       |      | 3,036 | 10,479 | ,012 | 7,957111  | 2,621236   | 2,152634        | 13,761588  |
| E | Equal<br>variances<br>assumed        | 1,411 | ,251 | ,370  | 17     | ,716 | 42,774900 | 115,736694 | -<br>201,408181 | 286,957981 |
|   | Equal<br>variances<br>not<br>assumed |       |      | ,362  | 13,748 | ,723 | 42,774900 | 118,234465 | -<br>211,249263 | 296,799063 |

#### 4. T-Test Normal vs Osteopenia

|                |                  | Group Statistics |           |                |                 |
|----------------|------------------|------------------|-----------|----------------|-----------------|
|                | Osteoporosis_WHO | N                | Mean      | Std. Deviation | Std. Error Mean |
| Age            | Normal           | 9                | 75,89     | 10,659         | 3,553           |
|                | Osteopenia       | 20               | 77,95     | 10,753         | 2,404           |
| T_Score        | Normal           | 9                | ,26889    | ,733969        | ,244656         |
|                | Osteopenia       | 20               | -1,83000  | ,372898        | ,083382         |
| BMD            | Normal           | 9                | ,96567    | ,104468        | ,034823         |
|                | Osteopenia       | 20               | ,66500    | ,051396        | ,011493         |
| $\rho_{b_1}$   | Normal           | 8                | 1,3496    | ,09379         | ,03316          |
|                | Osteopenia       | 20               | 1,2475    | ,09023         | ,02017          |
| $\rho_{b_2}$   | Normal           | 8                | 1,3630    | ,20743         | ,07334          |
|                | Osteopenia       | 20               | 1,2604    | ,13070         | ,02922          |
| $\rho_{r_1}$   | Normal           | 8                | 72,9768   | 13,99197       | 4,94691         |
|                | Osteopenia       | 20               | 68,3188   | 10,17342       | 2,27485         |
| $\rho_{r_2}$   | Normal           | 8                | 59,8340   | 13,95933       | 4,93537         |
|                | Osteopenia       | 20               | 38,1578   | 11,38776       | 2,54638         |
| $\rho_{app_1}$ | Normal           | 8                | ,9808     | ,17442         | ,06167          |
|                | Osteopenia       | 20               | ,8473     | ,11597         | ,02593          |
| $\rho_{app_2}$ | Normal           | 8                | ,7948     | ,14177         | ,05012          |
|                | Osteopenia       | 20               | ,4701     | ,10876         | ,02432          |
| $\sigma_p$     | Normal           | 8                | 11,30050  | 3,473780       | 1,228167        |
|                | Osteopenia       | 17               | 7,77141   | 3,764302       | ,912977         |
| $\sigma_{max}$ | Normal           | 9                | 14,11411  | 7,310808       | 2,436936        |
|                | Osteopenia       | 20               | 6,82910   | 4,548919       | 1,017169        |
| E              | Normal           | 9                | 647,24400 | 299,580037     | 99,860012       |
|                | Osteopenia       | 20               | 600,01900 | 304,228156     | 68,027484       |

### Independent Samples Test

|         |                             | Levene's Test for Equality of Variances |      | t-test for Equality of Means |        |                 |                 |                       |                                           |          |
|---------|-----------------------------|-----------------------------------------|------|------------------------------|--------|-----------------|-----------------|-----------------------|-------------------------------------------|----------|
|         |                             | F                                       | Sig. | t                            | df     | Sig. (2-tailed) | Mean Difference | Std. Error Difference | 95% Confidence Interval of the Difference |          |
|         |                             |                                         |      |                              |        |                 |                 |                       | Lower                                     | Upper    |
| Age     | Equal variances assumed     | ,013                                    | ,909 | -,479                        | 27     | ,636            | -2,061          | 4,305                 | -10,894                                   | 6,772    |
|         | Equal variances not assumed |                                         |      | -,480                        | 15,626 | ,638            | -2,061          | 4,290                 | -11,173                                   | 7,051    |
| T_Score | Equal variances assumed     | 16,452                                  | ,000 | 10,305                       | 27     | ,000            | 2,098889        | ,203670               | 1,680994                                  | 2,516784 |
|         | Equal variances not assumed |                                         |      | 8,120                        | 9,910  | ,000            | 2,098889        | ,258475               | 1,522261                                  | 2,675516 |
| BMD     | Equal variances assumed     | 17,264                                  | ,000 | 10,497                       | 27     | ,000            | ,300667         | ,028644               | ,241895                                   | ,359439  |
|         | Equal variances not assumed |                                         |      | 8,199                        | 9,789  | ,000            | ,300667         | ,036670               | ,218721                                   | ,382612  |
| ρ_b_1   | Equal variances assumed     | ,087                                    | ,770 | 2,678                        | 26     | ,013            | ,10218          | ,03815                | ,02375                                    | ,18060   |
|         | Equal variances not assumed |                                         |      | 2,632                        | 12,509 | ,021            | ,10218          | ,03882                | ,01798                                    | ,18637   |

|                    |                             |       |      |       |        |      |          |         |          |          |
|--------------------|-----------------------------|-------|------|-------|--------|------|----------|---------|----------|----------|
| ρ <sub>b_2</sub>   | Equal variances assumed     | ,838  | ,368 | 1,582 | 26     | ,126 | ,10265   | ,06490  | -,03075  | ,23605   |
|                    | Equal variances not assumed |       |      | 1,300 | 9,313  | ,225 | ,10265   | ,07895  | -,07503  | ,28033   |
| ρ <sub>r_1</sub>   | Equal variances assumed     | 1,113 | ,301 | ,983  | 26     | ,335 | 4,65800  | 4,73919 | -5,08354 | 14,39954 |
|                    | Equal variances not assumed |       |      | ,855  | 10,107 | ,412 | 4,65800  | 5,44489 | -7,45659 | 16,77259 |
| ρ <sub>r_2</sub>   | Equal variances assumed     | 1,414 | ,245 | 4,270 | 26     | ,000 | 21,67620 | 5,07595 | 11,24244 | 32,10996 |
|                    | Equal variances not assumed |       |      | 3,903 | 10,937 | ,002 | 21,67620 | 5,55355 | 9,44437  | 33,90803 |
| ρ <sub>app_1</sub> | Equal variances assumed     | 2,951 | ,098 | 2,377 | 26     | ,025 | ,13350   | ,05615  | ,01808   | ,24892   |
|                    | Equal variances not assumed |       |      | 1,996 | 9,584  | ,075 | ,13350   | ,06690  | -,01644  | ,28344   |
| ρ <sub>app_2</sub> | Equal variances assumed     | 1,428 | ,243 | 6,546 | 26     | ,000 | ,32465   | ,04960  | ,22271   | ,42659   |
|                    | Equal variances not assumed |       |      | 5,827 | 10,470 | ,000 | ,32465   | ,05571  | ,20127   | ,44803   |



|                |                                      |       |          |       |            |      |               |                |                     |                |
|----------------|--------------------------------------|-------|----------|-------|------------|------|---------------|----------------|---------------------|----------------|
| $\sigma_p$     | Equal<br>variances<br>assumed        | ,007  | ,93<br>4 | 2,238 | 23         | ,035 | 3,529088      | 1,577063       | ,266684             | 6,791492       |
|                | Equal<br>variances<br>not<br>assumed |       |          | 2,306 | 14,88<br>5 | ,036 | 3,529088      | 1,530334       | ,265068             | 6,793109       |
| $\sigma_{max}$ | Equal<br>variances<br>assumed        | 4,042 | ,05<br>4 | 3,292 | 27         | ,003 | 7,285011      | 2,213017       | 2,744276            | 11,825746      |
|                | Equal<br>variances<br>not<br>assumed |       |          | 2,759 | 10,89<br>1 | ,019 | 7,285011      | 2,640699       | 1,465778            | 13,104245      |
| E              | Equal<br>variances<br>assumed        | ,056  | ,81<br>4 | ,388  | 27         | ,701 | 47,22500<br>0 | 121,56325<br>8 | -<br>202,20220<br>2 | 296,65220<br>2 |
|                | Equal<br>variances<br>not<br>assumed |       |          | ,391  | 15,72<br>2 | ,701 | 47,22500<br>0 | 120,82946<br>9 | -<br>209,29013<br>2 | 303,74013<br>2 |

## 5. T-Test Osteopenia vs. Osteoporosis

|                |                  | Group Statistics |           |                |                 |
|----------------|------------------|------------------|-----------|----------------|-----------------|
|                | Osteoporosis_WHO | N                | Mean      | Std. Deviation | Std. Error Mean |
| Age            | Osteopenia       | 20               | 77,95     | 10,753         | 2,404           |
|                | Osteoporosis     | 10               | 88,50     | 7,397          | 2,339           |
| T_Score        | Osteopenia       | 20               | -1,83000  | ,372898        | ,083382         |
|                | Osteoporosis     | 10               | -3,15000  | ,638140        | ,201797         |
| BMD            | Osteopenia       | 20               | ,66500    | ,051396        | ,011493         |
|                | Osteoporosis     | 10               | ,52600    | ,101056        | ,031957         |
| $\rho_{b_1}$   | Osteopenia       | 20               | 1,2475    | ,09023         | ,02017          |
|                | Osteoporosis     | 9                | 1,2359    | ,10045         | ,03348          |
| $\rho_{b_2}$   | Osteopenia       | 20               | 1,2604    | ,13070         | ,02922          |
|                | Osteoporosis     | 9                | 1,2797    | ,12287         | ,04096          |
| $\rho_{r_1}$   | Osteopenia       | 20               | 68,3188   | 10,17342       | 2,27485         |
|                | Osteoporosis     | 9                | 60,0649   | 6,45287        | 2,15096         |
| $\rho_{r_2}$   | Osteopenia       | 20               | 38,1578   | 11,38776       | 2,54638         |
|                | Osteoporosis     | 9                | 34,9587   | 12,59395       | 4,19798         |
| $\rho_{app_1}$ | Osteopenia       | 20               | ,8473     | ,11597         | ,02593          |
|                | Osteoporosis     | 9                | ,7441     | ,10723         | ,03574          |
| $\rho_{app_2}$ | Osteopenia       | 20               | ,4701     | ,10876         | ,02432          |
|                | Osteoporosis     | 9                | ,4382     | ,13148         | ,04383          |
| $\sigma_p$     | Osteopenia       | 17               | 7,77141   | 3,764302       | ,912977         |
|                | Osteoporosis     | 8                | 7,53500   | 3,892683       | 1,376271        |
| $\sigma_{max}$ | Osteopenia       | 20               | 6,82910   | 4,548919       | 1,017169        |
|                | Osteoporosis     | 10               | 6,15700   | 3,053231       | ,965516         |
| E              | Osteopenia       | 20               | 600,01900 | 304,228156     | 68,027484       |
|                | Osteoporosis     | 10               | 604,46910 | 200,184081     | 63,303765       |

### Independent Samples Test

|         |                             | Levene's Test for Equality of Variances |      | t-test for Equality of Means |        |                 |                 |                       |                                           |          |
|---------|-----------------------------|-----------------------------------------|------|------------------------------|--------|-----------------|-----------------|-----------------------|-------------------------------------------|----------|
|         |                             | F                                       | Sig. | t                            | df     | Sig. (2-tailed) | Mean Difference | Std. Error Difference | 95% Confidence Interval of the Difference |          |
|         |                             |                                         |      |                              |        |                 |                 |                       | Lower                                     | Upper    |
| Age     | Equal variances assumed     | 1,217                                   | ,279 | -2,779                       | 28     | ,010            | -10,550         | 3,796                 | -18,325                                   | -2,775   |
|         | Equal variances not assumed |                                         |      | -3,145                       | 24,898 | ,004            | -10,550         | 3,355                 | -17,460                                   | -3,640   |
| T_Score | Equal variances assumed     | 3,138                                   | ,087 | 7,181                        | 28     | ,000            | 1,320000        | ,183814               | ,943475                                   | 1,696525 |
|         | Equal variances not assumed |                                         |      | 6,045                        | 12,168 | ,000            | 1,320000        | ,218346               | ,844991                                   | 1,795009 |
| BMD     | Equal variances assumed     | 3,191                                   | ,085 | 5,038                        | 28     | ,000            | ,139000         | ,027591               | ,082483                                   | ,195517  |
|         | Equal variances not assumed |                                         |      | 4,093                        | 11,388 | ,002            | ,139000         | ,033960               | ,064564                                   | ,213436  |
| ρ_b_1   | Equal variances assumed     | ,018                                    | ,895 | ,308                         | 27     | ,760            | ,01156          | ,03748                | -,06534                                   | ,08846   |
|         | Equal variances not assumed |                                         |      | ,296                         | 14,082 | ,772            | ,01156          | ,03909                | -,07224                                   | ,09536   |
| ρ_b_2   | Equal variances assumed     | ,000                                    | ,997 | -,375                        | 27     | ,711            | -,01932         | ,05155                | -,12509                                   | ,08645   |

|                |                             |       |      |       |        |      |         |          |           |          |
|----------------|-----------------------------|-------|------|-------|--------|------|---------|----------|-----------|----------|
|                | Equal variances not assumed |       |      | -,384 | 16,427 | ,706 | -,01932 | ,05032   | -,12576   | ,08712   |
| $\rho_{r_1}$   | Equal variances assumed     | ,910  | ,349 | 2,228 | 27     | ,034 | 8,25386 | 3,70430  | ,65327    | 15,85445 |
|                | Equal variances not assumed |       |      | 2,636 | 23,517 | ,015 | 8,25386 | 3,13074  | 1,78530   | 14,72242 |
| $\rho_{r_2}$   | Equal variances assumed     | ,620  | ,438 | ,678  | 27     | ,504 | 3,19913 | 4,71952  | -6,48453  | 12,88280 |
|                | Equal variances not assumed |       |      | ,652  | 14,163 | ,525 | 3,19913 | 4,90990  | -7,32023  | 13,71849 |
| $\rho_{app_1}$ | Equal variances assumed     | ,044  | ,836 | 2,265 | 27     | ,032 | ,10314  | ,04554   | ,00971    | ,19657   |
|                | Equal variances not assumed |       |      | 2,336 | 16,690 | ,032 | ,10314  | ,04416   | ,00984    | ,19644   |
| $\rho_{app_2}$ | Equal variances assumed     | ,657  | ,425 | ,685  | 27     | ,499 | ,03188  | ,04654   | -,06362   | ,12738   |
|                | Equal variances not assumed |       |      | ,636  | 13,160 | ,536 | ,03188  | ,05012   | -,07627   | ,14002   |
| $\sigma_p$     | Equal variances assumed     | ,007  | ,936 | ,145  | 23     | ,886 | ,236412 | 1,630880 | -3,137321 | 3,610144 |
|                | Equal variances not assumed |       |      | ,143  | 13,383 | ,888 | ,236412 | 1,651560 | -3,321225 | 3,794049 |
| $\sigma_{max}$ | Equal variances assumed     | 1,728 | ,199 | ,420  | 28     | ,677 | ,672100 | 1,598650 | -2,602586 | 3,946786 |

|   |                                      |       |      |       |        |      |           |            |                 |            |
|---|--------------------------------------|-------|------|-------|--------|------|-----------|------------|-----------------|------------|
|   | Equal<br>variances<br>not<br>assumed |       |      | ,479  | 25,301 | ,636 | ,672100   | 1,402446   | -2,214551       | 3,558751   |
| E | Equal<br>variances<br>assumed        | 2,648 | ,115 | -,042 | 28     | ,967 | -4,450100 | 106,549879 | -<br>222,707633 | 213,807433 |
|   | Equal<br>variances<br>not<br>assumed |       |      | -,048 | 25,611 | ,962 | -4,450100 | 92,925267  | -<br>195,602159 | 186,701959 |

## Regression analysis Archimedean density parameter vs. clinical density parameter

**Model Summary<sup>b</sup>**

| Model | R                 | R Square | Adjusted R Square | Std. Error of the Estimate |
|-------|-------------------|----------|-------------------|----------------------------|
| 1     | ,427 <sup>a</sup> | ,182     | ,159              | ,09273                     |

a. Predictors: (Constant), T\_Score

b. Dependent Variable:  $\rho_{b_1}$

**Model Summary<sup>b</sup>**

| Model | R                 | R Square | Adjusted R Square | Std. Error of the Estimate |
|-------|-------------------|----------|-------------------|----------------------------|
| 1     | ,427 <sup>a</sup> | ,182     | ,159              | ,09273                     |

a. Predictors: (Constant), T\_Score

b. Dependent Variable:  $\rho_{b_1}$

**Model Summary<sup>b</sup>**

| Model | R                 | R Square | Adjusted R Square | Std. Error of the Estimate |
|-------|-------------------|----------|-------------------|----------------------------|
| 1     | ,261 <sup>a</sup> | ,068     | ,042              | ,14662                     |

a. Predictors: (Constant), T\_Score

b. Dependent Variable:  $\rho_{b_2}$

**Model Summary<sup>b</sup>**

| Model | R                 | R Square | Adjusted R Square | Std. Error of the Estimate |
|-------|-------------------|----------|-------------------|----------------------------|
| 1     | ,324 <sup>a</sup> | ,105     | ,079              | 10,63079                   |

a. Predictors: (Constant), T\_Score

b. Dependent Variable:  $\rho_{r_1}$

**Model Summary<sup>b</sup>**

| Model | R                 | R Square | Adjusted R Square | Std. Error of the Estimate |
|-------|-------------------|----------|-------------------|----------------------------|
| 1     | ,572 <sup>a</sup> | ,327     | ,308              | 12,69269                   |

a. Predictors: (Constant), T\_Score

b. Dependent Variable:  $\rho_{r_2}$

### Model Summary<sup>b</sup>

| Model | R                 | R Square | Adjusted R Square | Std. Error of the Estimate |
|-------|-------------------|----------|-------------------|----------------------------|
| 1     | ,494 <sup>a</sup> | ,244     | ,222              | ,13134                     |

a. Predictors: (Constant), T\_Score

b. Dependent Variable:  $\rho_{app\_1}$

### Model Summary<sup>b</sup>

| Model | R                 | R Square | Adjusted R Square | Std. Error of the Estimate |
|-------|-------------------|----------|-------------------|----------------------------|
| 1     | ,702 <sup>a</sup> | ,493     | ,478              | ,13253                     |

a. Predictors: (Constant), T\_Score

b. Dependent Variable:  $\rho_{app\_2}$

### Model Summary<sup>b</sup>

| Model | R                 | R Square | Adjusted R Square | Std. Error of the Estimate |
|-------|-------------------|----------|-------------------|----------------------------|
| 1     | ,400 <sup>a</sup> | ,160     | ,136              | ,09396                     |

a. Predictors: (Constant), BMD

b. Dependent Variable:  $\rho_{b\_1}$

### Model Summary<sup>b</sup>

| Model | R                 | R Square | Adjusted R Square | Std. Error of the Estimate |
|-------|-------------------|----------|-------------------|----------------------------|
| 1     | ,209 <sup>a</sup> | ,044     | ,016              | ,14854                     |

a. Predictors: (Constant), BMD

b. Dependent Variable:  $\rho_{b\_2}$

### Model Summary<sup>b</sup>

| Model | R                 | R Square | Adjusted R Square | Std. Error of the Estimate |
|-------|-------------------|----------|-------------------|----------------------------|
| 1     | ,286 <sup>a</sup> | ,082     | ,056              | 10,76813                   |

a. Predictors: (Constant), BMD

b. Dependent Variable:  $\rho_{r\_1}$

### Model Summary<sup>b</sup>

| Model | R                 | R Square | Adjusted R Square | Std. Error of the Estimate |
|-------|-------------------|----------|-------------------|----------------------------|
| 1     | ,620 <sup>a</sup> | ,384     | ,366              | 12,14803                   |

a. Predictors: (Constant), BMD

b. Dependent Variable:  $\rho_{r_2}$

### Model Summary<sup>b</sup>

| Model | R                 | R Square | Adjusted R Square | Std. Error of the Estimate |
|-------|-------------------|----------|-------------------|----------------------------|
| 1     | ,450 <sup>a</sup> | ,203     | ,180              | ,13483                     |

a. Predictors: (Constant), BMD

b. Dependent Variable:  $\rho_{app_1}$

### Model Summary<sup>b</sup>

| Model | R                 | R Square | Adjusted R Square | Std. Error of the Estimate |
|-------|-------------------|----------|-------------------|----------------------------|
| 1     | ,737 <sup>a</sup> | ,543     | ,530              | ,12584                     |

a. Predictors: (Constant), BMD

b. Dependent Variable:  $\rho_{app_2}$



## Regression analysis mechanical parameter vs. density parameter

### Model Summary and Parameter Estimates

Dependent Variable: E

| Equation    | R Square | Model Summary |     |     |      | Parameter Estimates |         |
|-------------|----------|---------------|-----|-----|------|---------------------|---------|
|             |          | F             | df1 | df2 | Sig. | Constant            | b1      |
| Linear      | ,047     | 1,714         | 1   | 35  | ,199 | -101,105            | 572,312 |
| Power       | ,033     | 1,210         | 1   | 35  | ,279 | 414,592             | 1,250   |
| Exponential | ,032     | 1,158         | 1   | 35  | ,289 | 165,600             | ,955    |

The independent variable is  $\rho_{b_1}$ .

### Model Summary and Parameter Estimates

Dependent Variable: E

| Equation    | R Square | Model Summary |     |     |      | Parameter Estimates |         |
|-------------|----------|---------------|-----|-----|------|---------------------|---------|
|             |          | F             | df1 | df2 | Sig. | Constant            | b1      |
| Linear      | ,108     | 4,229         | 1   | 35  | ,047 | -131,805            | 587,041 |
| Power       | ,069     | 2,577         | 1   | 35  | ,117 | 407,009             | 1,260   |
| Exponential | ,076     | 2,884         | 1   | 35  | ,098 | 154,442             | ,994    |

The independent variable is  $\rho_{b_2}$ .

### Model Summary and Parameter Estimates

Dependent Variable: E

| Equation    | R Square | Model Summary |     |     |      | Parameter Estimates |        |
|-------------|----------|---------------|-----|-----|------|---------------------|--------|
|             |          | F             | df1 | df2 | Sig. | Constant            | b1     |
| Linear      | ,010     | ,347          | 1   | 35  | ,560 | 785,077             | -2,395 |
| Power       | ,005     | ,188          | 1   | 35  | ,667 | 1499,520            | -,237  |
| Exponential | ,004     | ,144          | 1   | 35  | ,707 | 684,449             | -,003  |

The independent variable is  $\rho_{r_1}$ .

### Model Summary and Parameter Estimates

Dependent Variable: E

| Equation    | R Square | Model Summary |     |     |      | Parameter Estimates |       |
|-------------|----------|---------------|-----|-----|------|---------------------|-------|
|             |          | F             | df1 | df2 | Sig. | Constant            | b1    |
| Linear      | ,133     | 5,383         | 1   | 35  | ,026 | 354,359             | 6,407 |
| Power       | ,226     | 10,239        | 1   | 35  | ,003 | 44,203              | ,689  |
| Exponential | ,183     | 7,849         | 1   | 35  | ,008 | 293,709             | ,015  |

The independent variable is  $\rho_{r_2}$ .

### Model Summary and Parameter Estimates

Dependent Variable: E

| Equation    | R Square | Model Summary |     |     |      | Parameter Estimates |      |
|-------------|----------|---------------|-----|-----|------|---------------------|------|
|             |          | F             | df1 | df2 | Sig. | Constant            | b1   |
| Linear      | ,000     | ,000          | 1   | 35  | ,998 | 623,201             | ,774 |
| Power       | ,000     | ,010          | 1   | 35  | ,920 | 560,315             | ,054 |
| Exponential | ,000     | ,010          | 1   | 35  | ,920 | 526,528             | ,062 |

The independent variable is  $\rho_{app\_1}$ .

### Model Summary and Parameter Estimates

Dependent Variable: E

| Equation    | R Square | Model Summary |     |     |      | Parameter Estimates |         |
|-------------|----------|---------------|-----|-----|------|---------------------|---------|
|             |          | F             | df1 | df2 | Sig. | Constant            | b1      |
| Linear      | ,227     | 10,264        | 1   | 35  | ,003 | 253,768             | 694,954 |
| Power       | ,360     | 19,714        | 1   | 35  | ,000 | 1058,483            | ,940    |
| Exponential | ,271     | 13,023        | 1   | 35  | ,001 | 245,592             | 1,531   |

The independent variable is  $\rho_{app\_2}$ .

### Model Summary and Parameter Estimates

Dependent Variable:  $\sigma_{max}$

| Equation    | R Square | Model Summary |     |     |      | Parameter Estimates |        |
|-------------|----------|---------------|-----|-----|------|---------------------|--------|
|             |          | F             | df1 | df2 | Sig. | Constant            | b1     |
| Linear      | ,191     | 8,237         | 1   | 35  | ,007 | -23,647             | 25,377 |
| Power       | ,127     | 5,095         | 1   | 35  | ,030 | 2,877               | 3,518  |
| Exponential | ,128     | 5,149         | 1   | 35  | ,030 | ,199                | 2,758  |

The independent variable is  $\rho_{b\_1}$ .

### Model Summary and Parameter Estimates

Dependent Variable:  $\sigma_{max}$

| Equation    | R Square | Model Summary |     |     |      | Parameter Estimates |        |
|-------------|----------|---------------|-----|-----|------|---------------------|--------|
|             |          | F             | df1 | df2 | Sig. | Constant            | b1     |
| Linear      | ,153     | 6,319         | 1   | 35  | ,017 | -11,258             | 15,348 |
| Power       | ,090     | 3,452         | 1   | 35  | ,072 | 3,918               | 2,080  |
| Exponential | ,101     | 3,915         | 1   | 35  | ,056 | ,783                | 1,649  |

The independent variable is  $\rho_{b\_2}$ .

### Model Summary and Parameter Estimates

Dependent Variable:  $\sigma_{\max}$

| Equation    | R Square | Model Summary |     |     |      | Parameter Estimates |      |
|-------------|----------|---------------|-----|-----|------|---------------------|------|
|             |          | F             | df1 | df2 | Sig. | Constant            | b1   |
| Linear      | ,007     | ,237          | 1   | 35  | ,629 | 5,567               | ,044 |
| Power       | ,002     | ,072          | 1   | 35  | ,790 | 2,685               | ,212 |
| Exponential | ,004     | ,155          | 1   | 35  | ,696 | 4,777               | ,005 |

The independent variable is  $\rho_{r_1}$ .

### Model Summary and Parameter Estimates

Dependent Variable:  $\sigma_{\max}$

| Equation    | R Square | Model Summary |     |     |      | Parameter Estimates |       |
|-------------|----------|---------------|-----|-----|------|---------------------|-------|
|             |          | F             | df1 | df2 | Sig. | Constant            | b1    |
| Linear      | ,292     | 14,420        | 1   | 35  | ,001 | -,254               | ,208  |
| Power       | ,392     | 22,589        | 1   | 35  | ,000 | ,053                | 1,309 |
| Exponential | ,343     | 18,293        | 1   | 35  | ,000 | 1,859               | ,030  |

The independent variable is  $\rho_{r_2}$ .

### Model Summary and Parameter Estimates

Dependent Variable:  $\sigma_{\max}$

| Equation    | R Square | Model Summary |     |     |      | Parameter Estimates |        |
|-------------|----------|---------------|-----|-----|------|---------------------|--------|
|             |          | F             | df1 | df2 | Sig. | Constant            | b1     |
| Linear      | ,074     | 2,811         | 1   | 35  | ,103 | -,661               | 10,763 |
| Power       | ,046     | 1,682         | 1   | 35  | ,203 | 7,766               | ,979   |
| Exponential | ,049     | 1,822         | 1   | 35  | ,186 | 2,431               | 1,163  |

The independent variable is  $\rho_{app_1}$ .

### Model Summary and Parameter Estimates

Dependent Variable:  $\sigma_{\max}$

| Equation    | R Square | Model Summary |     |     |      | Parameter Estimates |        |
|-------------|----------|---------------|-----|-----|------|---------------------|--------|
|             |          | F             | df1 | df2 | Sig. | Constant            | b1     |
| Linear      | ,507     | 35,963        | 1   | 35  | ,000 | -3,647              | 22,807 |
| Power       | ,598     | 51,963        | 1   | 35  | ,000 | 21,710              | 1,747  |
| Exponential | ,522     | 38,230        | 1   | 35  | ,000 | 1,278               | 3,066  |

The independent variable is  $\rho_{app_2}$ .

### Model Summary and Parameter Estimates

Dependent Variable:  $\sigma_p$

| Equation    | R Square | Model Summary |     |     |      | Parameter Estimates |        |
|-------------|----------|---------------|-----|-----|------|---------------------|--------|
|             |          | F             | df1 | df2 | Sig. | Constant            | b1     |
| Linear      | ,078     | 2,527         | 1   | 30  | ,122 | -5,165              | 10,757 |
| Power       | ,041     | 1,295         | 1   | 30  | ,264 | 4,401               | 1,982  |
| Exponential | ,038     | 1,179         | 1   | 30  | ,286 | 1,079               | 1,475  |

The independent variable is  $\rho_{b_1}$ .

### Model Summary and Parameter Estimates

Dependent Variable:  $\sigma_p$

| Equation    | R Square | Model Summary |     |     |      | Parameter Estimates |       |
|-------------|----------|---------------|-----|-----|------|---------------------|-------|
|             |          | F             | df1 | df2 | Sig. | Constant            | b1    |
| Linear      | ,056     | 1,782         | 1   | 30  | ,192 | ,718                | 6,041 |
| Power       | ,048     | 1,504         | 1   | 30  | ,230 | 4,884               | 1,466 |
| Exponential | ,049     | 1,546         | 1   | 30  | ,223 | 1,678               | 1,110 |

The independent variable is  $\rho_{b_2}$ .

### Model Summary and Parameter Estimates

Dependent Variable:  $\sigma_p$

| Equation    | R Square | Model Summary |     |     |      | Parameter Estimates |       |
|-------------|----------|---------------|-----|-----|------|---------------------|-------|
|             |          | F             | df1 | df2 | Sig. | Constant            | b1    |
| Linear      | ,115     | 3,903         | 1   | 30  | ,057 | ,516                | ,119  |
| Power       | ,114     | 3,865         | 1   | 30  | ,059 | ,011                | 1,551 |
| Exponential | ,118     | 4,016         | 1   | 30  | ,054 | 1,430               | ,024  |

The independent variable is  $\rho_{r_1}$ .

### Model Summary and Parameter Estimates

Dependent Variable:  $\sigma_p$

| Equation    | R Square | Model Summary |     |     |      | Parameter Estimates |      |
|-------------|----------|---------------|-----|-----|------|---------------------|------|
|             |          | F             | df1 | df2 | Sig. | Constant            | b1   |
| Linear      | ,134     | 4,657         | 1   | 30  | ,039 | 4,184               | ,099 |
| Power       | ,079     | 2,575         | 1   | 30  | ,119 | ,638                | ,644 |
| Exponential | ,094     | 3,121         | 1   | 30  | ,087 | 3,450               | ,016 |

The independent variable is  $\rho_{r_2}$ .

### Model Summary and Parameter Estimates

Dependent Variable:  $\sigma_p$

| Equation    | R Square | Model Summary |     |     |      | Parameter Estimates |        |
|-------------|----------|---------------|-----|-----|------|---------------------|--------|
|             |          | F             | df1 | df2 | Sig. | Constant            | b1     |
| Linear      | ,229     | 8,921         | 1   | 30  | ,006 | -2,447              | 12,834 |
| Power       | ,198     | 7,416         | 1   | 30  | ,011 | 10,025              | 2,067  |
| Exponential | ,181     | 6,629         | 1   | 30  | ,015 | 1,037               | 2,241  |

The independent variable is  $\rho_{app\_1}$ .

### Model Summary and Parameter Estimates

Dependent Variable:  $\sigma_p$

| Equation    | R Square | Model Summary |     |     |      | Parameter Estimates |        |
|-------------|----------|---------------|-----|-----|------|---------------------|--------|
|             |          | F             | df1 | df2 | Sig. | Constant            | b1     |
| Linear      | ,228     | 8,876         | 1   | 30  | ,006 | 2,382               | 10,943 |
| Power       | ,161     | 5,742         | 1   | 30  | ,023 | 13,497              | 1,045  |
| Exponential | ,156     | 5,532         | 1   | 30  | ,025 | 2,601               | 1,776  |

The independent variable is  $\rho_{app\_2}$ .

### Model Summary and Parameter Estimates

Dependent Variable: E

| Equation    | R Square | Model Summary |     |     |      | Parameter Estimates |         |
|-------------|----------|---------------|-----|-----|------|---------------------|---------|
|             |          | F             | df1 | df2 | Sig. | Constant            | b1      |
| Linear      | ,023     | ,860          | 1   | 37  | ,360 | 449,194             | 233,081 |
| Power       | ,009     | ,345          | 1   | 37  | ,561 | 583,638             | ,227    |
| Exponential | ,011     | ,413          | 1   | 37  | ,524 | 417,965             | ,351    |

The independent variable is BMD.

### Model Summary and Parameter Estimates

Dependent Variable:  $\sigma_{max}$

| Equation    | R Square | Model Summary |     |     |      | Parameter Estimates |        |
|-------------|----------|---------------|-----|-----|------|---------------------|--------|
|             |          | F             | df1 | df2 | Sig. | Constant            | b1     |
| Linear      | ,242     | 11,800        | 1   | 37  | ,001 | -3,001              | 16,228 |
| Power       | ,099     | 4,077         | 1   | 37  | ,051 | 9,383               | 1,018  |
| Exponential | ,113     | 4,705         | 1   | 37  | ,037 | 2,158               | 1,537  |

The independent variable is BMD.

### Model Summary and Parameter Estimates

Dependent Variable:  $\sigma_p$

| Equation    | R Square | Model Summary |     |     |      | Parameter Estimates |       |
|-------------|----------|---------------|-----|-----|------|---------------------|-------|
|             |          | F             | df1 | df2 | Sig. | Constant            | b1    |
| Linear      | ,105     | 3,649         | 1   | 31  | ,065 | 3,528               | 7,126 |
| Power       | ,042     | 1,372         | 1   | 31  | ,250 | 9,082               | ,642  |
| Exponential | ,044     | 1,422         | 1   | 31  | ,242 | 3,761               | ,905  |

The independent variable is BMD.
